# Supplementary material for: Evidence for continuity of interstitial spaces across tissue and organ boundaries in humans
Source: PubMed Central journal article supplement (PMC8012658; doi:10.1038/s42003-021-01962-0), 2021-03-31
Supplement: 42003_2021_1962_MOESM3_ESM.pdf [file 42003_2021_1962_MOESM3_ESM.pdf]

## **Description of Additional Supplementary Files**

**File Name:** Supplemental Data 1

**Description:** Source data for tattoo pigment particle sizes in colon specimens by region. SM: submucosa, MP: muscularis propria, Deep: deep mesenteric fascia, Std Dev: standard deviation.
